# Supplementary material for: Halophilic microbial community compositional shift after a rare rainfall in the Atacama Desert
Source: bioRxiv or medRxiv preprint supplement (doi:10.1101/442525), 2019-06-14
Supplement: Supplementary file [file media-1.pdf]

1 Supplementary Information for:

2  
3 **Halophilic microbial community composition shift after a rare rainfall in the Atacama**  
4 **Desert**

5  
6 Gherman Urtskiy, Samantha Getsin, Adam Munn, Benito Gomez-Silva, Alfonso Davila, Brian  
7 Glass, James Taylor\* and Jocelyne DiRuggiero\*

8  
9  
10 **Supplementary figures:**

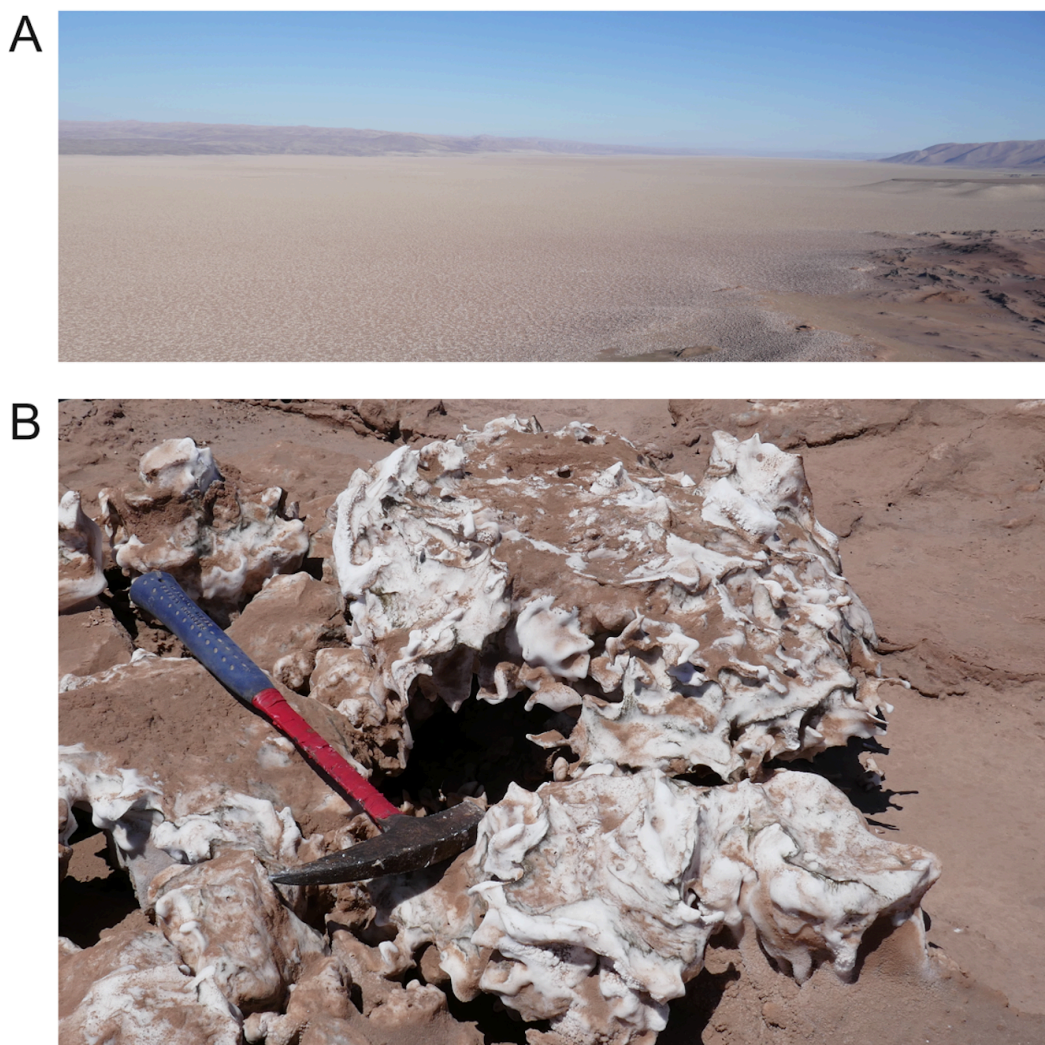

11  
12 **Fig. S1.** Salar Grande landscape and halite nodules. (A) Aerial view of the evaporitic basin of Salar  
13 Grande, 5 km wide and 45 km long (N-S direction). (B) Halite nodules (salt rocks) 20 to 50 cm in  
14 size.

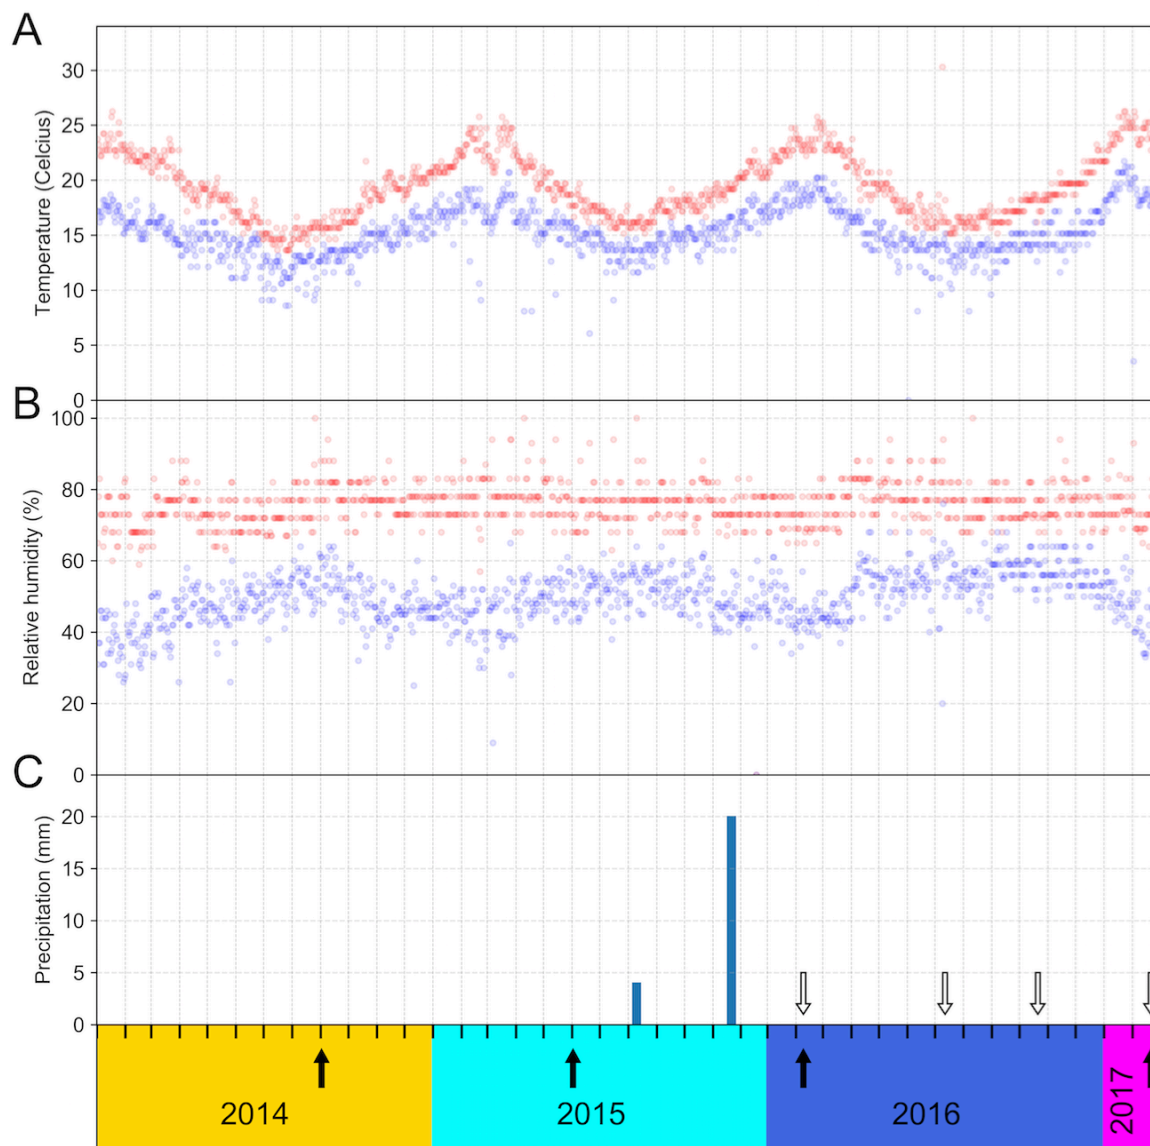

17  
 18  
 19  
 20  
 21  
 22  
 23

**Fig. S2.** Regional climate data from the Diego Aracena International Airport weather station, 40km North-West of Salar Grande. The maximum (red) and minimum (blue) temperature (A) and relative humidity (B) values, and total daily precipitation (C), are plotted for each date along the x-axis. Colors denote the year (2014-2017), x-ticks denote months, black arrows show the main sampling dates at Site 1, and white arrows show the sampling dates at Site 2.

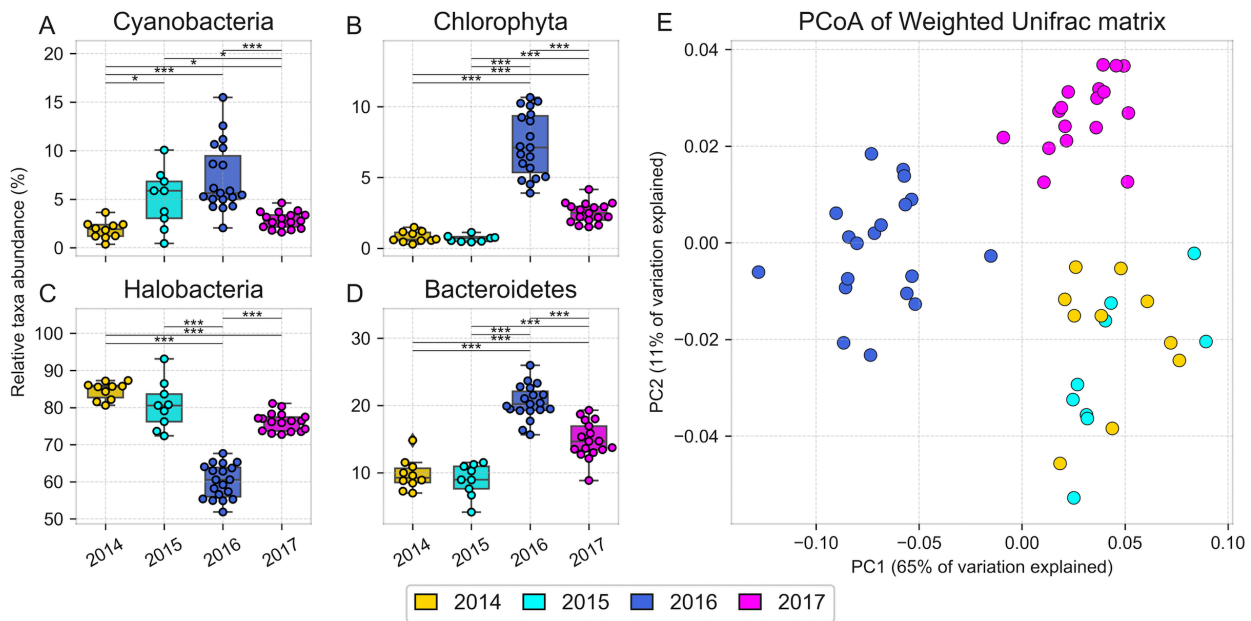

24  
25  
26  
27  
28  
29  
30  
31

**Fig. S3.** Taxonomic composition of halite nodules from Site 1 over time inferred from 16S rRNA gene sequences clustered into OTUs at 97% identity and visualized through (A-D) relative abundance of the dominant phyla (Chloroplast was used as a proxy for Chlorophyta and Halobacteria was the only class of Euyarchaeota) whose abundance significantly shifted after the rain and a (E) PCoA plot of a Weighted Unifrac dissimilarity matrix comparing taxonomic composition. Error bars represent standard deviation; significance bars represent group significance based on a two tail t-test, and stars denote the p-value thresholds (\*=0.01, \*\*=0.001, \*\*\*=0.0001).

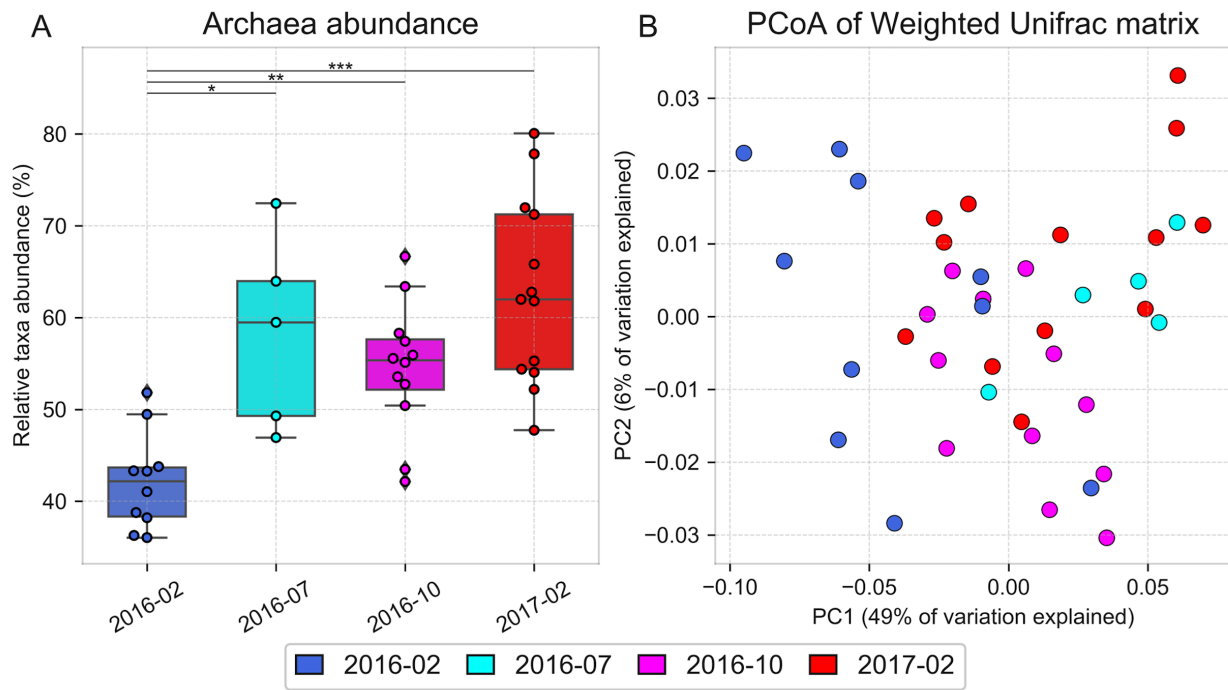

32

33 **Fig. S4.** Taxonomic composition of halite nodules harvested post-rain from Site 2 over time, inferred  
 34 from 16S rRNA gene sequences clustered into OTUs at 97% identity and visualized through (A)  
 35 relative abundance of Archaea, and (B) PCoA projection of the Weighted Unifrac dissimilarity  
 36 matrix. Error bars represent standard deviation; significance bars represent group significance based  
 37 on a two tail t-test, and stars denote the p-value thresholds (\*=0.01, \*\*=0.001, \*\*\*=0.0001).

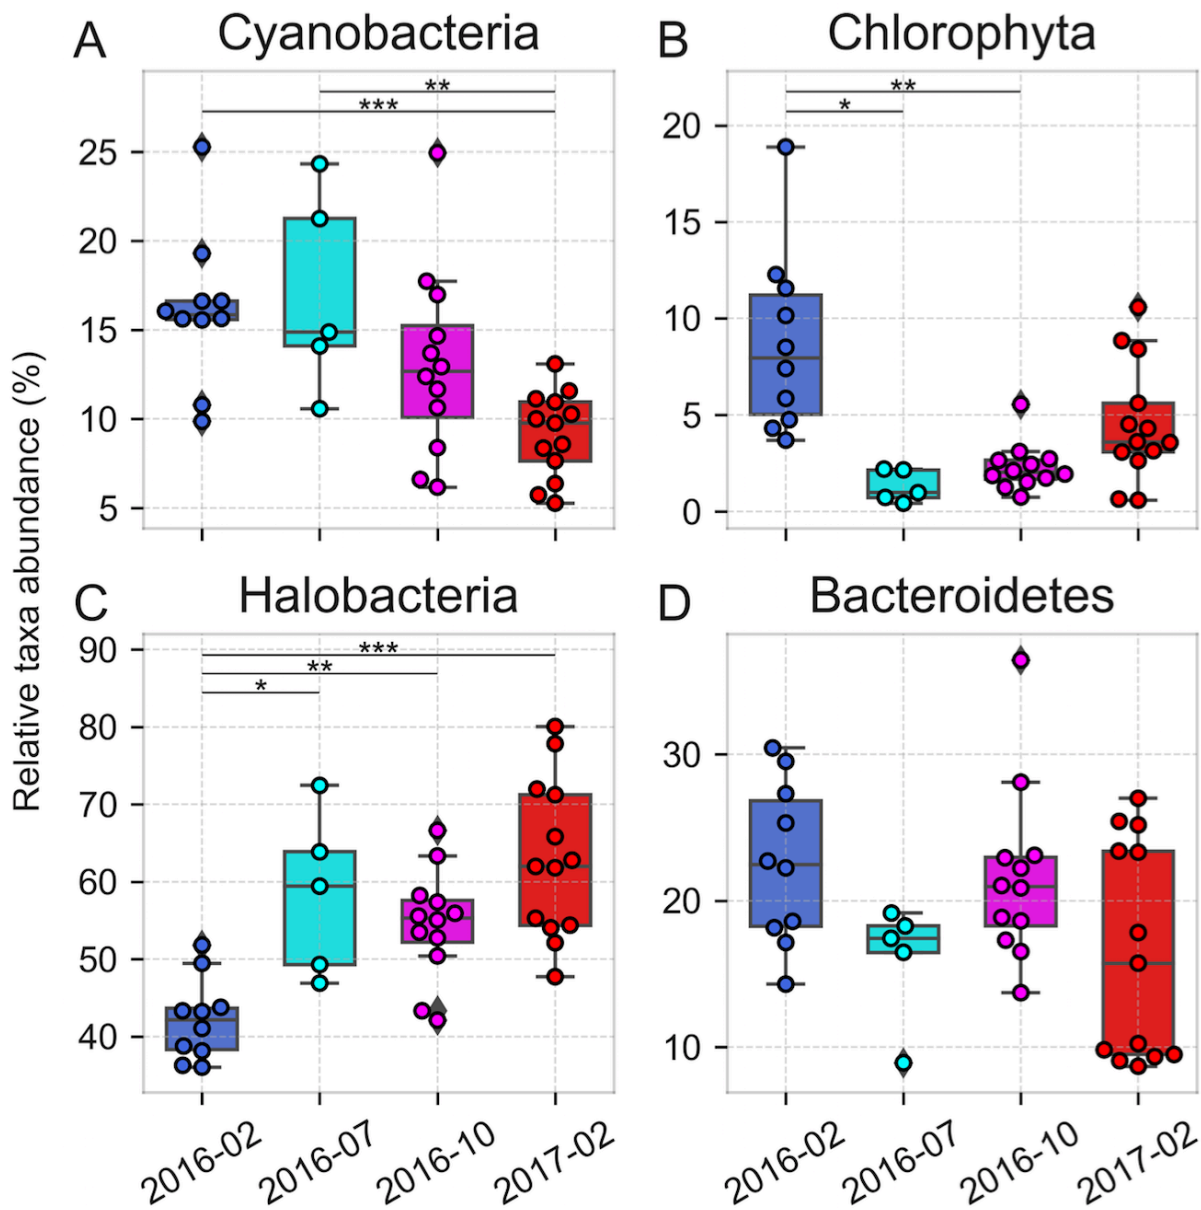

38

39 **Fig. S5.** Taxonomic composition of halite nodules harvested post-rain from Site 2 over time, inferred  
 40 from 16S rRNA gene sequences clustered into OTUs at 97% identity and visualized through the  
 41 relative abundance of dominant phyla (Chloroplast was used as a proxy for Chlorophyta and  
 42 Halobacteria was the only class of Euyarchaeota) (A-D) Error bars represent standard deviation;  
 43 significance bars represent group significance based on a two tail t-test, and stars denote the p-value  
 44 thresholds (\*=0.01, \*\*=0.001, \*\*\*=0.0001).



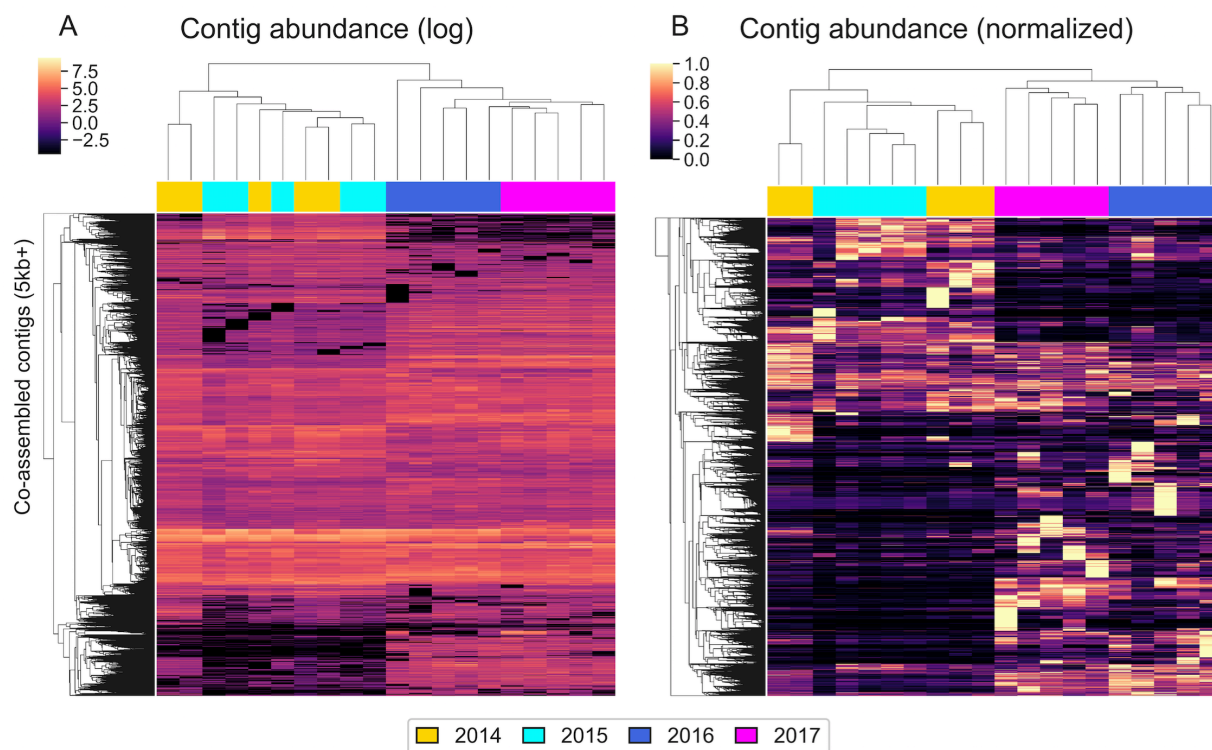

45

46 **Fig. S6.** Hierarchical clustering (Euclidean metric) of relative abundances (fragments per million) of  
 47 contigs > 5kbp in the WMG co-assembly, quantified with reads from samples harvested at different  
 48 dates and displayed on (A) a log scale and (B) standardized to the maximum abundance of each  
 49 contig.

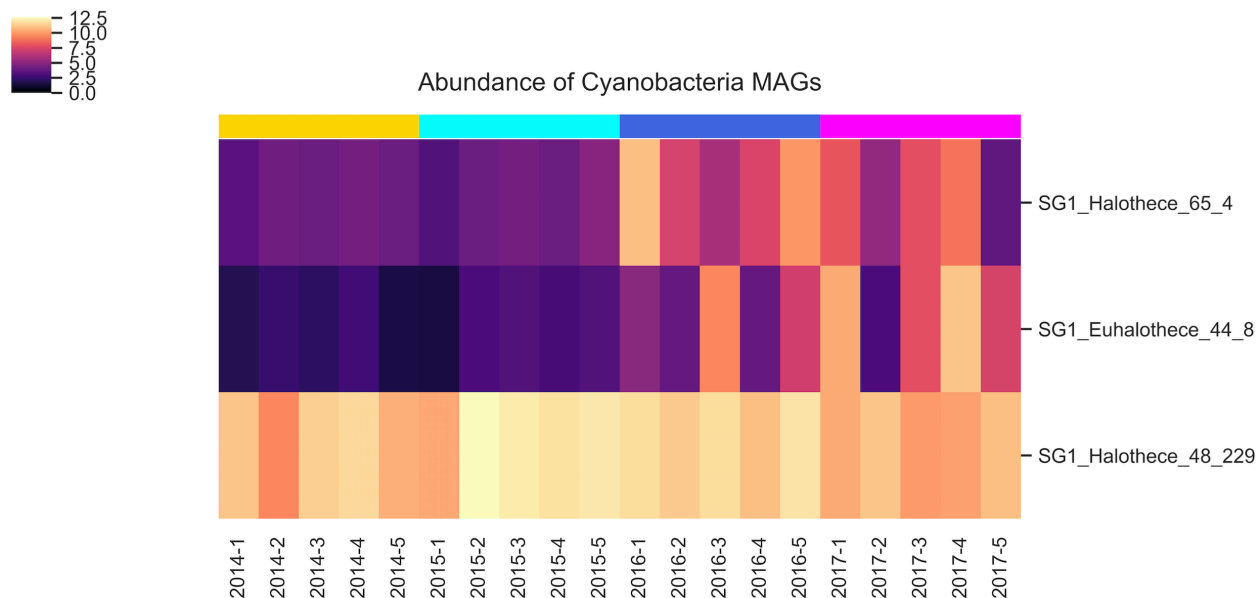

50

51 **Fig. S7.** Hierarchical clustering (Euclidean metric) of photosynthetic MAG relative abundances  
 52 (fragments per million), quantified with metaWRAP's quant\_bins module, showing the emergence  
 53 of two new *Cyanobacteria* MAGs after the rain.  
 54  
 55

56 **Data S1.** Summary table of 16S rRNA gene OTUs clustered at 97% for Site 1 and Site 2,  
 57 including OTU abundances across replicates, taxonomy, representative sequences, and  
 58 stacked taxonomy plots visualizing community composition across the time-points and  
 59 replicates.

61 **Data S2.** Summary table of reconstructed metagenome-assembled genomes (MAGs) with  
 62 information about sequence statistics, binning accuracy estimated with CheckM, assembly  
 63 coverage, taxonomy, and abundance across replicates in the time series.

64  
 65  
 66 **Tables (Supplementary):**

| Site | Latitude        | Longitude       | Elevation (asl) | Collection dates | Amplicon sequencing replicates | Shotgun sequencing replicates | Purpose                          |
|------|-----------------|-----------------|-----------------|------------------|--------------------------------|-------------------------------|----------------------------------|
| S1   | 20°57' 12.006"S | 70°1' 10.5996"W | 680m            | Sep-14           | 10                             | 5                             | Before-after rain comparison     |
|      |                 |                 |                 | Jun-15           | 9                              | 5                             |                                  |
|      |                 |                 |                 | 8-Feb-16         | 19                             | 5                             |                                  |
|      |                 |                 |                 | 20-Feb-17        | 17                             | 5                             |                                  |
| S2   | 20°57' 8.5212"S | 70°1' 1.2612"W  | 664m            | 8-Feb-16         | 12                             | NA                            | After rain recovery process      |
|      |                 |                 |                 | 11-Jul-16        | 5                              | NA                            |                                  |
|      |                 |                 |                 | 20-Oct-16        | 12                             | NA                            |                                  |
|      |                 |                 |                 | 20-Feb-17        | 13                             | NA                            |                                  |
| S3   | 20°55' 48.18"S  | 70°0' 49.32"W   | 676m            | Misc.            | NA                             | 15                            | Assembly and binning improvement |

67 **Table S1.** Description of sampling locations, dates, and replicate counts of biological samples  
 68 collected for this study.

69
